# Supplementary material
Source: publisher figshare collection journal article supplement (https://aacr.figshare.com/ndownloader/files/39843312)
Supplement: Supplementary file 1 [file 39843312]

## **Supplementary Figure Legends**

**Supplementary figure S1:** Expression of BRCA2 missense constructs. Full-length BRCA2 wild-type and mutant or variant proteins are equally expressed, as verified by IP-WB, 72 h after transient transfection of the constructs into HEK293T cells.

**Supplementary figure S2:** Location of the non-pathogenic and intermediate variants in the mouse BRCA2-DSS1-ssDNA complex (pdb ID: 1MJE). The top panel shows the non-pathogenic variants while the bottom panel depicts the intermediate variants. The figure was generated using Pymol Molecular Graphics version 1.3.
